# Supplementary material for: Whole-Genome Sequencing of Shiga Toxin-Producing Escherichia coli for Characterization and Outbreak Investigation
Source: MDPI journal article supplement (doi:10.3390/microorganisms11051298), 2023-05-16
Supplement: s1 [file s1]

## Blankenship et al. Supplemental Data

**Figure S1.** Flowchart of the bioinformatic tools used to classify 625 Shiga toxin-producing *Escherichia coli* (STEC) isolates or *Shigella* isolates submitted for whole-genome sequencing (WGS) by the Michigan Department of Health and Human Services.

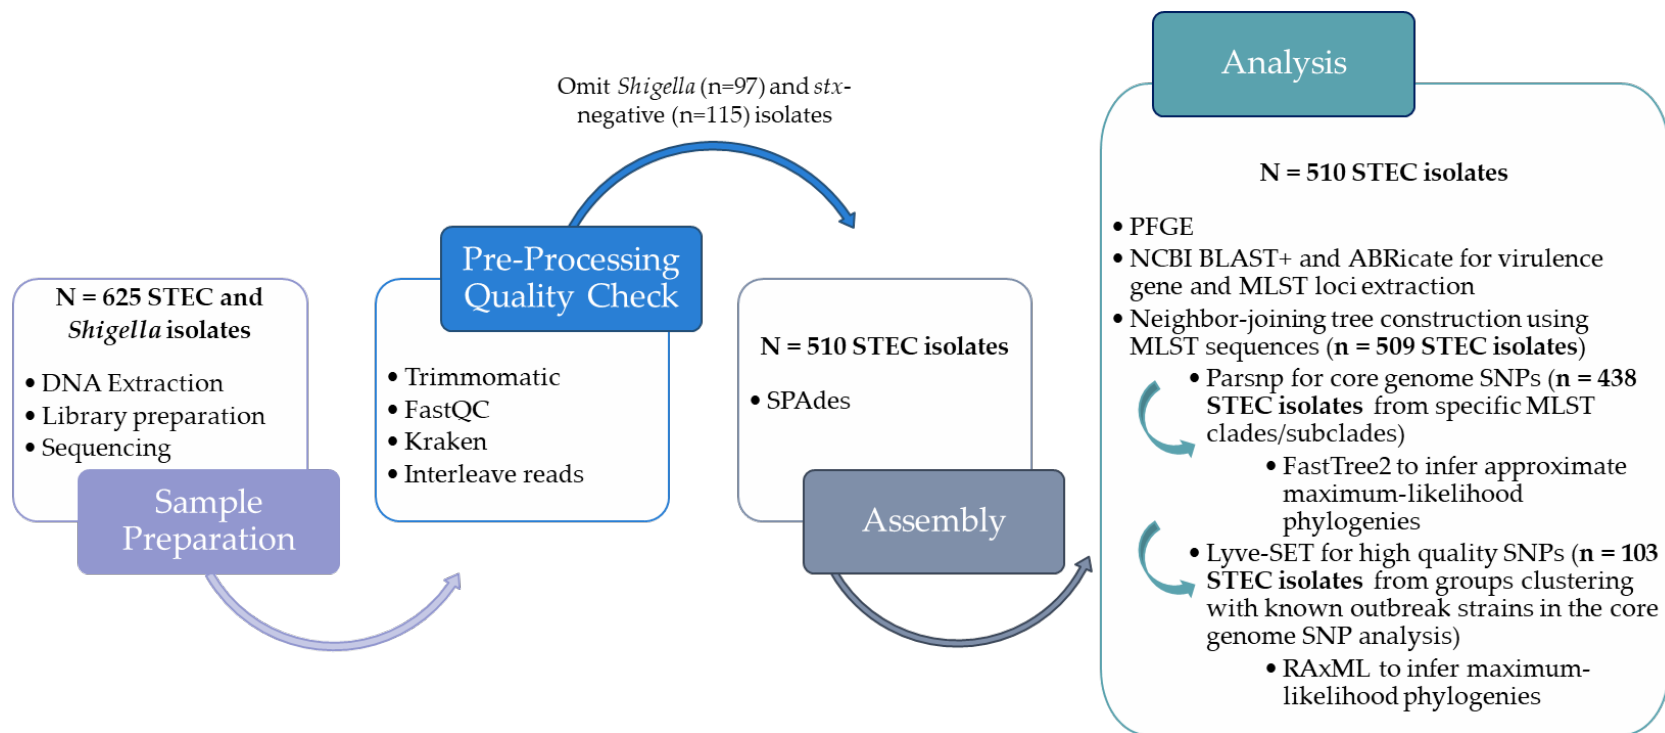

1561 PNUSAE000697.fasta  
 1562 PNUSAE003119.fasta  
 1563 PNUSAE001586.fasta ★  
 1564 PNUSAE021666.fasta  
 1565 PNUSAE006147.fasta  
 1566 PNUSAE006749.fasta  
 1567 PNUSAE014625.fasta  
 1568 PNUSAE001003.fasta  
 1569 PNUSAE001200.fasta  
 1570 PNUSAE012759.fasta

PFGE-XbaI\_NonO157

WGS\_id  
 PNUSAE001586  
 PNUSAE001592

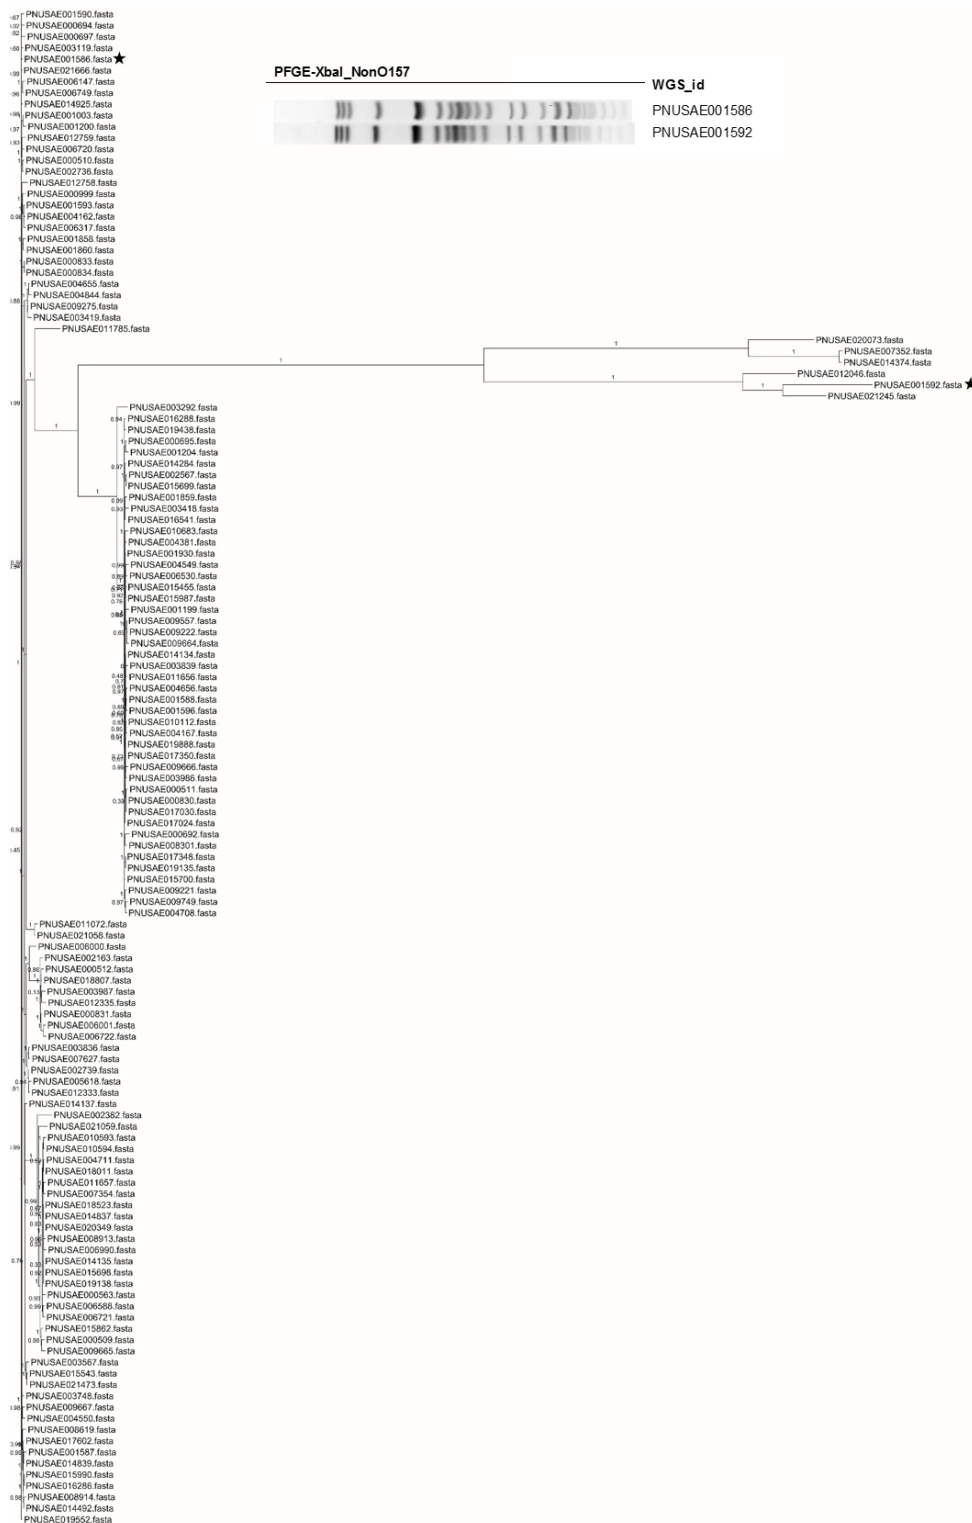

**Figure S3.** cgSNP phylogeny of 186 STEC strains belonging to subclade A within Clade I in the MLST tree. All but two strains were classified as ST-119, while the stars highlight the placement of the two O103:H2 outbreak associated strains, PNUSAE004161 and PNUSAE004654, in the cgSNP phylogeny.

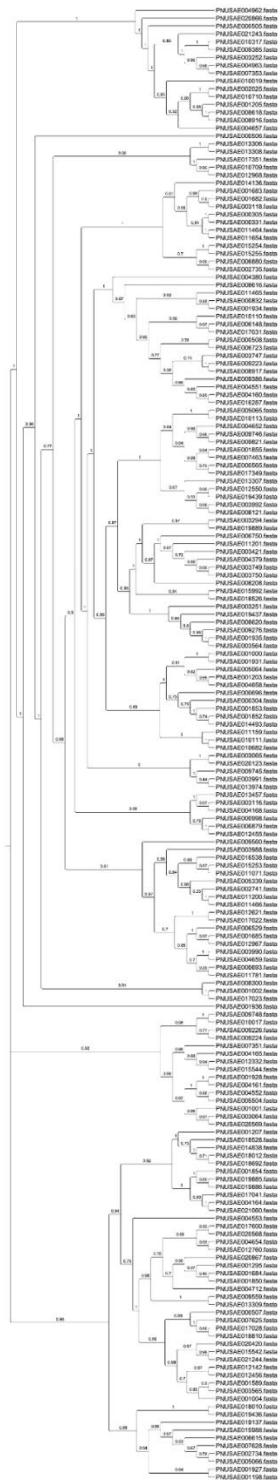

**Figure S4.** cgSNP analysis of 98 STEC O157:H7 strains classified as ST-66. Sixteen strains from three outbreaks, denoted as ST-66-O1 (open star), ST-66-O2 (black star), and ST-66-O3 (open triangle), were included in the analysis.

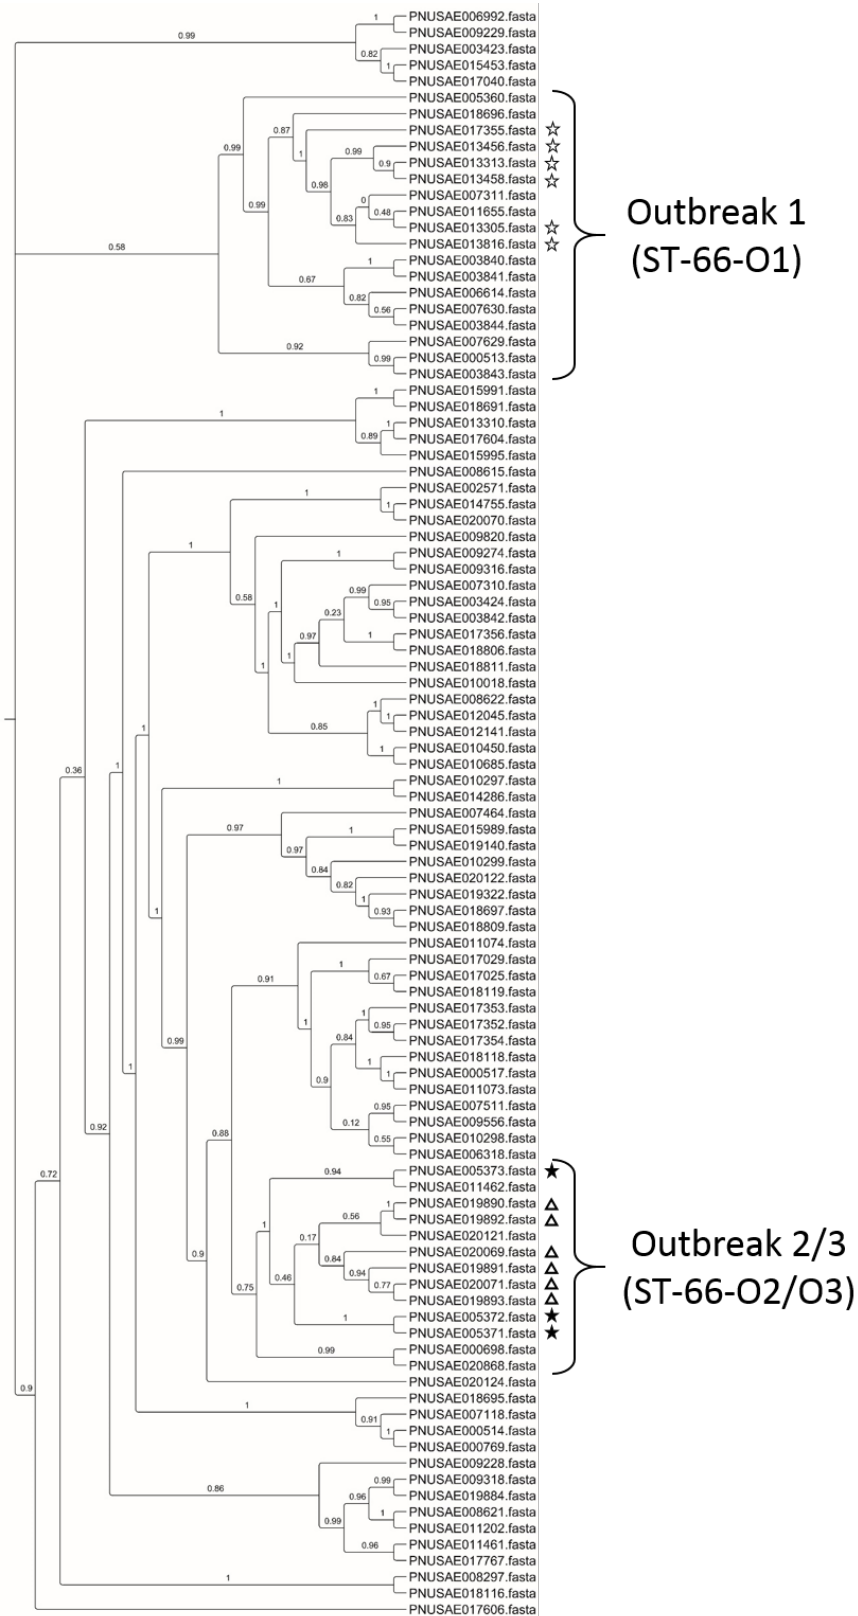

**Figure S5.** cgSNP analysis of 17 STEC strains belonging to subclade G within Clade I in the MLST tree. Outbreak-associated strains belonging to serogroup O5:H9 are indicated with black stars.

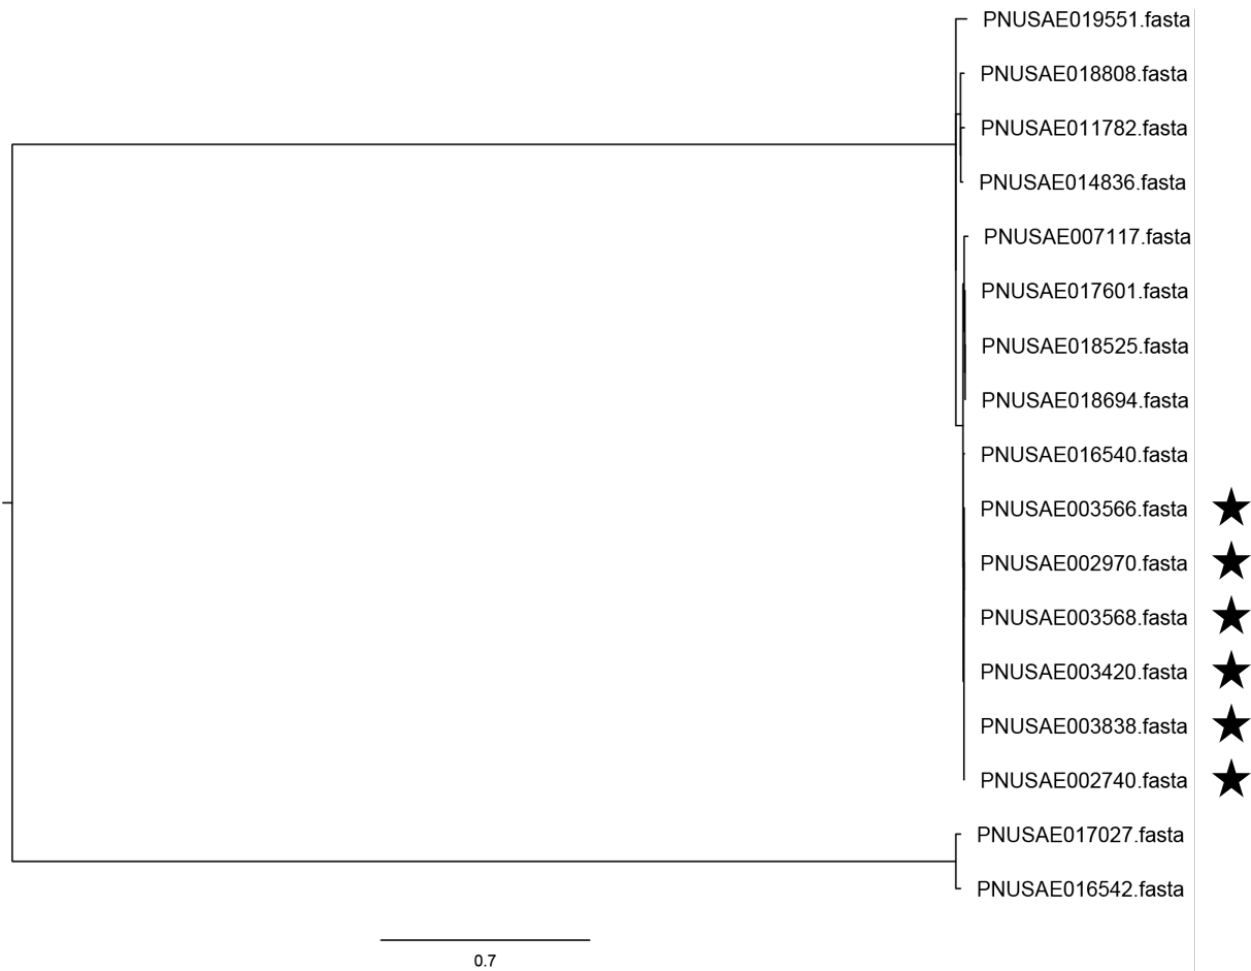

**Table S1:** Number of STEC serogroups detected in Michigan between 2015 and 2018 for WGS.

| Serogroup         | Year |      |      |      | Total |
|-------------------|------|------|------|------|-------|
|                   | 2015 | 2016 | 2017 | 2018 |       |
| O5                | 0    | 6    | 2    | 7    | 15    |
| O17               | 0    | 3    | 0    | 3    | 6     |
| O28ac             | 0    | 1    | 0    | 1    | 2     |
| O55               | 0    | 2    | 0    | 0    | 2     |
| O69               | 1    | 0    | 1    | 1    | 3     |
| O71               | 1    | 1    | 8    | 7    | 17    |
| O73 or<br>O17/O77 | 0    | 0    | 1    | 1    | 2     |
| O8                | 0    | 0    | 0    | 3    | 3     |
| O80               | 0    | 0    | 0    | 1    | 1     |
| O84               | 0    | 1    | 2    | 1    | 4     |
| O85               | 0    | 0    | 1    | 0    | 1     |
| O98               | 0    | 0    | 0    | 1    | 1     |
| O109              | 0    | 1    | 0    | 0    | 1     |
| O113              | 0    | 0    | 1    | 0    | 1     |
| O115              | 0    | 1    | 0    | 0    | 1     |
| O117              | 0    | 1    | 0    | 0    | 1     |
| O118              | 0    | 0    | 0    | 1    | 1     |
| O123              | 4    | 3    | 3    | 3    | 13    |
| O130              | 0    | 1    | 0    | 0    | 1     |
| O151              | 2    | 3    | 3    | 2    | 10    |
| O153/O178         | 0    | 0    | 0    | 1    | 1     |
| O156              | 0    | 0    | 0    | 2    | 2     |
| O165              | 0    | 0    | 1    | 1    | 2     |
| O166              | 0    | 1    | 0    | 0    | 1     |
| O172              | 0    | 0    | 0    | 1    | 1     |
| O177              | 0    | 0    | 0    | 3    | 3     |
| O183              | 0    | 0    | 1    | 2    | 3     |
| O26               | 14   | 12   | 10   | 15   | 51    |
| O45               | 13   | 16   | 21   | 11   | 61    |
| O103              | 21   | 23   | 26   | 41   | 111   |
| O111              | 10   | 10   | 11   | 16   | 47    |
| O121              | 8    | 13   | 6    | 1    | 28    |
| O145              | 0    | 2    | 0    | 4    | 6     |
| O157              | 5    | 11   | 33   | 49   | 98    |
| NT                | 5    | 0    | 1    | 3    | 9     |
| Totals            | 84   | 112  | 132  | 182  | 510   |

**Table S2. Accession numbers for STEC strains used in the study.** Sequences were submitted to the National Center for Biotechnology Information (NCBI) as part of BioProject PRJNA218110 available at: [www.ncbi.nlm.nih.gov/bioproject/218110](http://www.ncbi.nlm.nih.gov/bioproject/218110) (accessed on 1 September 2019).

| NCBI BioSample | CDC PulseNet Strain Name |
|----------------|--------------------------|
| SAMN03382866   | PNUSAE000304             |
| SAMN03382867   | PNUSAE000305             |
| SAMN03382869   | PNUSAE000331             |
| SAMN03492160   | PNUSAE000505             |
| SAMN03492161   | PNUSAE000506             |
| SAMN03492162   | PNUSAE000507             |
| SAMN03492163   | PNUSAE000508             |
| SAMN03492164   | PNUSAE000509             |
| SAMN03492165   | PNUSAE000510             |
| SAMN03492166   | PNUSAE000511             |
| SAMN03492167   | PNUSAE000512             |
| SAMN03610070   | PNUSAE000563             |
| SAMN03610071   | PNUSAE000564             |
| SAMN03610072   | PNUSAE000565             |
| SAMN03610079   | PNUSAE000513             |
| SAMN03610080   | PNUSAE000517             |
| SAMN03763865   | PNUSAE000692             |
| SAMN03763866   | PNUSAE000693             |
| SAMN03763867   | PNUSAE000694             |
| SAMN03763868   | PNUSAE000695             |
| SAMN03763869   | PNUSAE000697             |
| SAMN03763870   | PNUSAE000696             |
| SAMN03763871   | PNUSAE000698             |
| SAMN03795200   | PNUSAE000514             |
| SAMN03795203   | PNUSAE000769             |
| SAMN03795204   | PNUSAE000830             |
| SAMN03795205   | PNUSAE000831             |
| SAMN03795206   | PNUSAE000832             |
| SAMN03795207   | PNUSAE000833             |
| SAMN03795208   | PNUSAE000834             |
| SAMN03857010   | PNUSAE000998             |
| SAMN03857011   | PNUSAE000999             |
| SAMN03857012   | PNUSAE001000             |
| SAMN03857013   | PNUSAE001001             |
| SAMN03857014   | PNUSAE001002             |
| SAMN03857015   | PNUSAE001003             |
| SAMN03857016   | PNUSAE001004             |

| NCBI BioSample | CDC PulseNet Strain Name |
|----------------|--------------------------|
| SAMN03981626   | PNUSAE001203             |
| SAMN03981627   | PNUSAE001198             |
| SAMN03981628   | PNUSAE001199             |
| SAMN03981629   | PNUSAE001200             |
| SAMN03981630   | PNUSAE001202             |
| SAMN03981631   | PNUSAE001204             |
| SAMN03981632   | PNUSAE001206             |
| SAMN04010054   | PNUSAE001207             |
| SAMN04010055   | PNUSAE001208             |
| SAMN04010056   | PNUSAE001295             |
| SAMN04191663   | PNUSAE001586             |
| SAMN04191664   | PNUSAE001587             |
| SAMN04191665   | PNUSAE001588             |
| SAMN04191666   | PNUSAE001589             |
| SAMN04191667   | PNUSAE001590             |
| SAMN04191668   | PNUSAE001592             |
| SAMN04191669   | PNUSAE001593             |
| SAMN04191670   | PNUSAE001594             |
| SAMN04191671   | PNUSAE001595             |
| SAMN04191672   | PNUSAE001596             |
| SAMN04230435   | PNUSAE001591             |
| SAMN04230436   | PNUSAE001682             |
| SAMN04230437   | PNUSAE001683             |
| SAMN04230438   | PNUSAE001684             |
| SAMN04230439   | PNUSAE001685             |
| SAMN04335022   | PNUSAE001850             |
| SAMN04335024   | PNUSAE001852             |
| SAMN04335025   | PNUSAE001853             |
| SAMN04335026   | PNUSAE001854             |
| SAMN04335027   | PNUSAE001858             |
| SAMN04335028   | PNUSAE001859             |
| SAMN04335029   | PNUSAE001860             |
| SAMN04335031   | PNUSAE001855             |
| SAMN04351182   | PNUSAE001857             |
| SAMN04351183   | PNUSAE001934             |
| SAMN04351184   | PNUSAE001935             |
| SAMN04351185   | PNUSAE001936             |
| SAMN04351186   | PNUSAE001928             |
| SAMN04351187   | PNUSAE001929             |
| SAMN04351188   | PNUSAE001930             |



| NCBI BioSample | CDC PulseNet Strain Name |
|----------------|--------------------------|
| SAMN04351189   | PNUSAE001927             |
| SAMN04351190   | PNUSAE001933             |
| SAMN04351191   | PNUSAE001931             |
| SAMN04351192   | PNUSAE001932             |
| SAMN04445972   | PNUSAE002162             |
| SAMN04445980   | PNUSAE002163             |
| SAMN04518090   | PNUSAE002380             |
| SAMN04518092   | PNUSAE002382             |
| SAMN04518098   | PNUSAE002025             |
| SAMN04568477   | PNUSAE002567             |
| SAMN04568478   | PNUSAE002568             |
| SAMN04568479   | PNUSAE002569             |
| SAMN04568480   | PNUSAE002570             |
| SAMN04568481   | PNUSAE002571             |
| SAMN04632362   | PNUSAE002734             |
| SAMN04632363   | PNUSAE002735             |
| SAMN04632364   | PNUSAE002736             |
| SAMN04632365   | PNUSAE002737             |
| SAMN04632366   | PNUSAE002738             |
| SAMN04632367   | PNUSAE002739             |
| SAMN04632368   | PNUSAE002740             |
| SAMN04632369   | PNUSAE002741             |
| SAMN04931569   | PNUSAE002970             |
| SAMN04962256   | PNUSAE003064             |
| SAMN04962257   | PNUSAE003065             |
| SAMN05163612   | PNUSAE003117             |
| SAMN05163613   | PNUSAE003118             |
| SAMN05163614   | PNUSAE003119             |
| SAMN05163615   | PNUSAE003115             |
| SAMN05201340   | PNUSAE003250             |
| SAMN05201341   | PNUSAE003251             |
| SAMN05201342   | PNUSAE003252             |
| SAMN05201343   | PNUSAE003253             |
| SAMN05201344   | PNUSAE003254             |
| SAMN05225544   | PNUSAE003292             |
| SAMN05225545   | PNUSAE003293             |
| SAMN05225546   | PNUSAE003294             |
| SAMN05292333   | PNUSAE003424             |
| SAMN05292334   | PNUSAE003417             |
| SAMN05292335   | PNUSAE003419             |
| SAMN05292336   | PNUSAE003423             |

| NCBI BioSample | CDC PulseNet Strain Name |
|----------------|--------------------------|
| SAMN05292337   | PNUSAE003420             |
| SAMN05292338   | PNUSAE003421             |
| SAMN05372176   | PNUSAE003565             |
| SAMN05372177   | PNUSAE003566             |
| SAMN05372178   | PNUSAE003567             |
| SAMN05372179   | PNUSAE003418             |
| SAMN05432126   | PNUSAE003747             |
| SAMN05432127   | PNUSAE003748             |
| SAMN05432128   | PNUSAE003749             |
| SAMN05432138   | PNUSAE003564             |
| SAMN05432139   | PNUSAE003568             |
| SAMN05505246   | PNUSAE003840             |
| SAMN05505247   | PNUSAE003841             |
| SAMN05505248   | PNUSAE003842             |
| SAMN05505249   | PNUSAE003843             |
| SAMN05505250   | PNUSAE003844             |
| SAMN05505251   | PNUSAE003835             |
| SAMN05505252   | PNUSAE003836             |
| SAMN05505253   | PNUSAE003837             |
| SAMN05505254   | PNUSAE003839             |
| SAMN05505255   | PNUSAE003750             |
| SAMN05560426   | PNUSAE003986             |
| SAMN05560427   | PNUSAE003838             |
| SAMN05560428   | PNUSAE003988             |
| SAMN05560429   | PNUSAE003989             |
| SAMN05560430   | PNUSAE003990             |
| SAMN05560431   | PNUSAE003992             |
| SAMN05660005   | PNUSAE004162             |
| SAMN05660006   | PNUSAE004165             |
| SAMN05660007   | PNUSAE004166             |
| SAMN05660008   | PNUSAE004168             |
| SAMN05660013   | PNUSAE004160             |
| SAMN05751972   | PNUSAE004381             |
| SAMN05751982   | PNUSAE004379             |
| SAMN05805028   | PNUSAE004549             |
| SAMN05805029   | PNUSAE004380             |
| SAMN05805030   | PNUSAE003991             |
| SAMN05805031   | PNUSAE004167             |
| SAMN05805032   | PNUSAE004550             |
| SAMN05805033   | PNUSAE004551             |

| NCBI BioSample | CDC PulseNet Strain Name |
|----------------|--------------------------|
| SAMN05805034   | PNUSAE004552             |
| SAMN05805035   | PNUSAE004553             |
| SAMN05859320   | PNUSAE004652             |
| SAMN05859321   | PNUSAE004653             |
| SAMN05859322   | PNUSAE004654             |
| SAMN05859323   | PNUSAE004655             |
| SAMN05859324   | PNUSAE004656             |
| SAMN05859325   | PNUSAE004657             |
| SAMN05859326   | PNUSAE004659             |
| SAMN05859327   | PNUSAE004161             |
| SAMN05859328   | PNUSAE004163             |
| SAMN05859329   | PNUSAE004164             |
| SAMN05879162   | PNUSAE004708             |
| SAMN05879163   | PNUSAE004709             |
| SAMN05879164   | PNUSAE004710             |
| SAMN05879165   | PNUSAE004711             |
| SAMN05879166   | PNUSAE004712             |
| SAMN05914957   | PNUSAE004658             |
| SAMN05914958   | PNUSAE004787             |
| SAMN05933680   | PNUSAE004844             |
| SAMN05978632   | PNUSAE004962             |
| SAMN05978633   | PNUSAE004963             |
| SAMN05978634   | PNUSAE004964             |
| SAMN06020427   | PNUSAE005066             |
| SAMN06020431   | PNUSAE005064             |
| SAMN06111355   | PNUSAE005338             |
| SAMN06111356   | PNUSAE005339             |
| SAMN06145158   | PNUSAE005065             |
| SAMN06145162   | PNUSAE005371             |
| SAMN06145163   | PNUSAE005372             |
| SAMN06145164   | PNUSAE005373             |
| SAMN06145165   | PNUSAE005360             |
| SAMN06174471   | PNUSAE005504             |
| SAMN06212806   | PNUSAE005617             |
| SAMN06212807   | PNUSAE005618             |
| SAMN06324315   | PNUSAE006000             |
| SAMN06449135   | PNUSAE006001             |
| SAMN06449141   | PNUSAE006147             |
| SAMN06449142   | PNUSAE006148             |
| SAMN06464031   | PNUSAE001205             |
| SAMN06606893   | PNUSAE006317             |

| NCBI BioSample | CDC PulseNet Strain Name |
|----------------|--------------------------|
| SAMN06677638   | PNUSAE006529             |
| SAMN06677639   | PNUSAE006588             |
| SAMN06677640   | PNUSAE006530             |
| SAMN06701394   | PNUSAE006615             |
| SAMN06701395   | PNUSAE006614             |
| SAMN06704733   | PNUSAE003987             |
| SAMN06759798   | PNUSAE006720             |
| SAMN06759799   | PNUSAE006721             |
| SAMN06759800   | PNUSAE006722             |
| SAMN06806028   | PNUSAE006723             |
| SAMN06843059   | PNUSAE006749             |
| SAMN06843060   | PNUSAE006750             |
| SAMN06855417   | PNUSAE006879             |
| SAMN06855428   | PNUSAE003116             |
| SAMN06898047   | PNUSAE006880             |
| SAMN06911692   | PNUSAE006318             |
| SAMN07139316   | PNUSAE007118             |
| SAMN07143102   | PNUSAE006989             |
| SAMN07143111   | PNUSAE006992             |
| SAMN07172902   | PNUSAE006991             |
| SAMN07172904   | PNUSAE006990             |
| SAMN07173337   | PNUSAE007117             |
| SAMN07193415   | PNUSAE007310             |
| SAMN07193416   | PNUSAE007351             |
| SAMN07193417   | PNUSAE007353             |
| SAMN07193418   | PNUSAE007354             |
| SAMN07216945   | PNUSAE007311             |
| SAMN07216946   | PNUSAE007352             |
| SAMN07216955   | PNUSAE007464             |
| SAMN07216956   | PNUSAE007463             |
| SAMN07246882   | PNUSAE007511             |
| SAMN07303548   | PNUSAE007625             |
| SAMN07303549   | PNUSAE007626             |
| SAMN07303550   | PNUSAE008121             |
| SAMN07303551   | PNUSAE007629             |
| SAMN07303552   | PNUSAE007630             |
| SAMN07303553   | PNUSAE007628             |
| SAMN07346315   | PNUSAE007627             |
| SAMN07349421   | PNUSAE008297             |
| SAMN07349875   | PNUSAE008299             |

| NCBI BioSample | CDC PulseNet Strain Name |
|----------------|--------------------------|
| SAMN07349876   | PNUSAE008300             |
| SAMN07349885   | PNUSAE008207             |
| SAMN07362151   | PNUSAE008298             |
| SAMN07373014   | PNUSAE008301             |
| SAMN07450893   | PNUSAE008614             |
| SAMN07450894   | PNUSAE008615             |
| SAMN07450895   | PNUSAE008616             |
| SAMN07450896   | PNUSAE008621             |
| SAMN07450909   | PNUSAE008622             |
| SAMN07450910   | PNUSAE008617             |
| SAMN07450911   | PNUSAE008618             |
| SAMN07450912   | PNUSAE008619             |
| SAMN07450913   | PNUSAE008620             |
| SAMN07508916   | PNUSAE008917             |
| SAMN07519426   | PNUSAE008916             |
| SAMN07523017   | PNUSAE009228             |
| SAMN07523018   | PNUSAE009229             |
| SAMN07523019   | PNUSAE009221             |
| SAMN07523020   | PNUSAE009222             |
| SAMN07523021   | PNUSAE009223             |
| SAMN07523022   | PNUSAE009224             |
| SAMN07523024   | PNUSAE009226             |
| SAMN07554541   | PNUSAE008913             |
| SAMN07554542   | PNUSAE008914             |
| SAMN07561509   | PNUSAE009275             |
| SAMN07561510   | PNUSAE009274             |
| SAMN07561511   | PNUSAE009276             |
| SAMN07567275   | PNUSAE009318             |
| SAMN07624152   | PNUSAE009557             |
| SAMN07624153   | PNUSAE009558             |
| SAMN07624154   | PNUSAE009556             |
| SAMN07624155   | PNUSAE009560             |
| SAMN07624163   | PNUSAE009385             |
| SAMN07624164   | PNUSAE009386             |
| SAMN07629708   | PNUSAE009664             |
| SAMN07629709   | PNUSAE009665             |
| SAMN07629710   | PNUSAE009666             |
| SAMN07647586   | PNUSAE009559             |
| SAMN07647587   | PNUSAE009667             |
| SAMN07663082   | PNUSAE009747             |
| SAMN07663083   | PNUSAE009820             |

| NCBI BioSample | CDC PulseNet Strain Name |
|----------------|--------------------------|
| SAMN07663084   | PNUSAE009821             |
| SAMN07721579   | PNUSAE009745             |
| SAMN07721580   | PNUSAE009746             |
| SAMN07750440   | PNUSAE010017             |
| SAMN07750441   | PNUSAE010018             |
| SAMN07750442   | PNUSAE010019             |
| SAMN07750443   | PNUSAE010110             |
| SAMN07750449   | PNUSAE009749             |
| SAMN07750450   | PNUSAE010111             |
| SAMN07750451   | PNUSAE010112             |
| SAMN07750452   | PNUSAE010113             |
| SAMN07788950   | PNUSAE009748             |
| SAMN07816711   | PNUSAE010298             |
| SAMN07816712   | PNUSAE010299             |
| SAMN07816713   | PNUSAE010317             |
| SAMN07816714   | PNUSAE010297             |
| SAMN07842331   | PNUSAE010593             |
| SAMN07842332   | PNUSAE010594             |
| SAMN07967330   | PNUSAE008208             |
| SAMN07967331   | PNUSAE010450             |
| SAMN07967334   | PNUSAE010685             |
| SAMN07967335   | PNUSAE010682             |
| SAMN07967337   | PNUSAE010683             |
| SAMN07967338   | PNUSAE010709             |
| SAMN08027469   | PNUSAE010684             |
| SAMN08100391   | PNUSAE011071             |
| SAMN08100392   | PNUSAE011072             |
| SAMN08100393   | PNUSAE011074             |
| SAMN08128621   | PNUSAE011159             |
| SAMN08128622   | PNUSAE011200             |
| SAMN08128623   | PNUSAE011202             |
| SAMN08136953   | PNUSAE011073             |
| SAMN08202707   | PNUSAE010710             |
| SAMN08202708   | PNUSAE011201             |
| SAMN08202709   | PNUSAE011463             |
| SAMN08202710   | PNUSAE011464             |
| SAMN08202711   | PNUSAE011462             |
| SAMN08225344   | PNUSAE011461             |
| SAMN08225345   | PNUSAE011465             |
| SAMN08225346   | PNUSAE011466             |

| NCBI BioSample | CDC PulseNet Strain Name |
|----------------|--------------------------|
| SAMN08299193   | PNUSAE011657             |
| SAMN08299194   | PNUSAE011656             |
| SAMN08299195   | PNUSAE011655             |
| SAMN08299196   | PNUSAE011654             |
| SAMN08359589   | PNUSAE011785             |
| SAMN08359593   | PNUSAE011781             |
| SAMN08359594   | PNUSAE011782             |
| SAMN08359595   | PNUSAE011783             |
| SAMN08451861   | PNUSAE012046             |
| SAMN08451862   | PNUSAE012045             |
| SAMN08499982   | PNUSAE012141             |
| SAMN08595226   | PNUSAE012332             |
| SAMN08595241   | PNUSAE012335             |
| SAMN08595242   | PNUSAE012333             |
| SAMN08610765   | PNUSAE012331             |
| SAMN08646836   | PNUSAE012456             |
| SAMN08646837   | PNUSAE012455             |
| SAMN08743511   | PNUSAE012621             |
| SAMN08743512   | PNUSAE012550             |
| SAMN08743514   | PNUSAE012142             |
| SAMN08796833   | PNUSAE012757             |
| SAMN08799703   | PNUSAE012760             |
| SAMN08799704   | PNUSAE012759             |
| SAMN08799706   | PNUSAE012758             |
| SAMN08868516   | PNUSAE012968             |
| SAMN08868517   | PNUSAE012967             |
| SAMN08964481   | PNUSAE013310             |
| SAMN08964482   | PNUSAE013309             |
| SAMN08964483   | PNUSAE013306             |
| SAMN08964484   | PNUSAE013305             |
| SAMN08971255   | PNUSAE013308             |
| SAMN08971842   | PNUSAE013313             |
| SAMN08971845   | PNUSAE013312             |
| SAMN09012044   | PNUSAE013458             |
| SAMN09012045   | PNUSAE013457             |
| SAMN09012046   | PNUSAE013456             |
| SAMN09092835   | PNUSAE013816             |
| SAMN09092836   | PNUSAE013307             |
| SAMN09229873   | PNUSAE013974             |
| SAMN09238033   | PNUSAE014134             |
| SAMN09238051   | PNUSAE014137             |

| NCBI BioSample | CDC PulseNet Strain Name |
|----------------|--------------------------|
| SAMN09238054   | PNUSAE014136             |
| SAMN09281082   | PNUSAE014286             |
| SAMN09281083   | PNUSAE014285             |
| SAMN09281084   | PNUSAE014284             |
| SAMN09289793   | PNUSAE014374             |
| SAMN09289794   | PNUSAE014135             |
| SAMN09289795   | PNUSAE012334             |
| SAMN09375717   | PNUSAE014493             |
| SAMN09405439   | PNUSAE014755             |
| SAMN09474595   | PNUSAE014492             |
| SAMN09489318   | PNUSAE014925             |
| SAMN09489319   | PNUSAE014839             |
| SAMN09489320   | PNUSAE014837             |
| SAMN09489321   | PNUSAE014836             |
| SAMN09489762   | PNUSAE014838             |
| SAMN09489766   | PNUSAE014835             |
| SAMN09533790   | 2017C-4625C1             |
| SAMN09623419   | PNUSAE015455             |
| SAMN09623420   | PNUSAE015453             |
| SAMN09623421   | PNUSAE015255             |
| SAMN09623422   | PNUSAE015254             |
| SAMN09623423   | PNUSAE015253             |
| SAMN09637202   | PNUSAE015544             |
| SAMN09637203   | PNUSAE015542             |
| SAMN09637221   | PNUSAE015543             |
| SAMN09691739   | PNUSAE015862             |
| SAMN09697972   | PNUSAE015700             |
| SAMN09697975   | PNUSAE015699             |
| SAMN09697977   | PNUSAE015698             |
| SAMN09740356   | PNUSAE016284             |
| SAMN09753001   | PNUSAE015995             |
| SAMN09753004   | PNUSAE015991             |
| SAMN09753005   | PNUSAE015989             |
| SAMN09753006   | PNUSAE015988             |
| SAMN09753007   | PNUSAE015987             |
| SAMN09753136   | PNUSAE015990             |
| SAMN09763529   | PNUSAE016288             |
| SAMN09763530   | PNUSAE016287             |
| SAMN09763531   | PNUSAE016286             |
| SAMN09813306   | PNUSAE017024             |



| NCBI BioSample | CDC PulseNet Strain Name |
|----------------|--------------------------|
| SAMN09813308   | PNUSAE017023             |
| SAMN09813309   | PNUSAE017022             |
| SAMN09813318   | PNUSAE017041             |
| SAMN09813319   | PNUSAE017040             |
| SAMN09813320   | PNUSAE017031             |
| SAMN09813322   | PNUSAE017030             |
| SAMN09813323   | PNUSAE017029             |
| SAMN09813325   | PNUSAE017028             |
| SAMN09813326   | PNUSAE017027             |
| SAMN09813327   | PNUSAE017026             |
| SAMN09813329   | PNUSAE017025             |
| SAMN09878826   | PNUSAE017354             |
| SAMN09878827   | PNUSAE017353             |
| SAMN09878828   | PNUSAE017352             |
| SAMN09878829   | PNUSAE017351             |
| SAMN09878830   | PNUSAE017350             |
| SAMN09878831   | PNUSAE017349             |
| SAMN09878832   | PNUSAE017348             |
| SAMN09878841   | PNUSAE017356             |
| SAMN09878842   | PNUSAE017355             |
| SAMN09910495   | PNUSAE017601             |
| SAMN09910539   | PNUSAE017602             |
| SAMN09934159   | PNUSAE016542             |
| SAMN09934160   | PNUSAE016541             |
| SAMN09934161   | PNUSAE016540             |
| SAMN09934163   | PNUSAE016538             |
| SAMN09979469   | PNUSAE017604             |
| SAMN09979470   | PNUSAE017600             |
| SAMN09979483   | PNUSAE017606             |
| SAMN09979484   | PNUSAE017605             |
| SAMN09986376   | PNUSAE017603             |
| SAMN09986383   | PNUSAE017767             |
| SAMN10038191   | PNUSAE018116             |
| SAMN10038192   | PNUSAE018118             |
| SAMN10112217   | PNUSAE018528             |
| SAMN10112218   | PNUSAE018527             |
| SAMN10112219   | PNUSAE018526             |
| SAMN10112220   | PNUSAE018525             |
| SAMN10112221   | PNUSAE018119             |
| SAMN10112225   | PNUSAE018523             |
| SAMN10139577   | PNUSAE018806             |

| NCBI BioSample | CDC PulseNet Strain Name |
|----------------|--------------------------|
| SAMN10139578   | PNUSAE018694             |
| SAMN10139579   | PNUSAE018696             |
| SAMN10139580   | PNUSAE018693             |
| SAMN10139581   | PNUSAE018691             |
| SAMN10139593   | PNUSAE018811             |
| SAMN10139594   | PNUSAE018697             |
| SAMN10139595   | PNUSAE018810             |
| SAMN10139596   | PNUSAE018809             |
| SAMN10139597   | PNUSAE018807             |
| SAMN10139599   | PNUSAE018695             |
| SAMN10227572   | PNUSAE019140             |
| SAMN10227573   | PNUSAE019139             |
| SAMN10227574   | PNUSAE019138             |
| SAMN10227575   | PNUSAE019137             |
| SAMN10227576   | PNUSAE019135             |
| SAMN10231735   | PNUSAE019322             |
| SAMN10267413   | PNUSAE019438             |
| SAMN10267414   | PNUSAE019437             |
| SAMN10267415   | PNUSAE019436             |
| SAMN10267416   | PNUSAE018808             |
| SAMN10267417   | PNUSAE015992             |
| SAMN10279432   | PNUSAE019554             |
| SAMN10279433   | PNUSAE019553             |
| SAMN10279434   | PNUSAE019552             |
| SAMN10279803   | PNUSAE019551             |
| SAMN10352909   | PNUSAE019439             |
| SAMN10391782   | PNUSAE019887             |
| SAMN10391783   | PNUSAE019884             |
| SAMN10391785   | PNUSAE019892             |
| SAMN10391786   | PNUSAE019890             |
| SAMN10391787   | PNUSAE019889             |
| SAMN10391788   | PNUSAE019888             |
| SAMN10391795   | PNUSAE020073             |
| SAMN10391796   | PNUSAE020072             |
| SAMN10391797   | PNUSAE020071             |
| SAMN10391798   | PNUSAE020070             |
| SAMN10391799   | PNUSAE020069             |
| SAMN10432149   | PNUSAE020124             |
| SAMN10432150   | PNUSAE020122             |
| SAMN10432151   | PNUSAE020121             |

| NCBI BioSample | CDC PulseNet Strain Name |
|----------------|--------------------------|
| SAMN10432152   | PNUSAE019891             |
| SAMN10432153   | PNUSAE020120             |
| SAMN10432154   | PNUSAE019886             |
| SAMN10432284   | PNUSAE020123             |
| SAMN10449172   | PNUSAE020349             |
| SAMN10503925   | PNUSAE020569             |
| SAMN10503926   | PNUSAE020568             |
| SAMN10619093   | PNUSAE020420             |
| SAMN10619107   | PNUSAE020868             |
| SAMN10619108   | PNUSAE020867             |
| SAMN10619110   | PNUSAE020866             |
| SAMN10661712   | PNUSAE021245             |
| SAMN10661713   | PNUSAE021244             |
| SAMN10661714   | PNUSAE021060             |
| SAMN10661715   | PNUSAE021058             |
| SAMN10661716   | PNUSAE021059             |
| SAMN10700124   | PNUSAE018009             |
| SAMN10700163   | PNUSAE021358             |
| SAMN10700164   | PNUSAE018012             |
| SAMN10700165   | PNUSAE018011             |
| SAMN10700166   | PNUSAE018010             |
| SAMN10774441   | PNUSAE021243             |
| SAMN10774615   | PNUSAE019893             |
| SAMN10774616   | PNUSAE021666             |
| SAMN10774617   | PNUSAE021473             |
| SAMN10774618   | PNUSAE019885             |

Note: Sequences belonging to strains PNUSAE009316 and PNUSAE018692 are missing from the NCBI database
